## Computational modeling for antiarrhythmic drugs for atrial fibrillation according to the genotypes

Hwang I.; Park J.; Kwon O.; Lim B.; Hong M.; Kim M.; Yu H.; Kim T.; Uhm J.; Joung B.; Lee M.; Pak H.

Yonsei University, Seoul, Korea (Republic of)

**Funding Acknowledgements:** Type of funding sources: Public grant(s) – National budget only. Main funding source(s): This work was supported by a grant [HI19C0114] from the Ministry of Health and Welfare. Additionally, the work was funded by grants [NRF-2019R1C1C100907512], and [NRF-2020R1A2B01001695] from the Basic Science Research Program run by the National Research Foundation of Korea (NRF) under the Ministry of Science, ICT & Future Planning (MSIP).

**Background:** The efficacy of antiarrhythmic drugs (AAD) can vary in patients with atrial fibrillation (AF) and the PITX2 gene affects the responsiveness of AADs. We explored the virtual AAD (V-AAD) responses between wild-type and PITX2+/- deficient AF conditions by realistic in-silico AF modeling.

**Methods:** We tested the V-AADs in AF modeling integrated with patients' 3D-computed tomography and 3D-electroanatomical mapping, acquired in 25 patients (68% male, 59.8 ± 9.8 years old, 32.0% paroxysmal type). The ion currents for the PITX2+/- deficiency and each AAD (amiodarone, sotalol, dronedarone, flecainide, and propafenone) were defined based on previous publications.

**Results:** We compared the wild-type and PITX2+/- deficiency in terms of the action potential duration (APD90), conduction velocity (CV), maximal slope of restitution (Smax), and wave-dynamic parameters, such as the dominant frequency (DF), phase singularities (PS), and AF termination rates according to the V-AADs. The PITX2+/- deficient model exhibited a shorter APD90 (p < 0.001), a lower Smax (p < 0.001), mean DF (p = 0.012), PS number (p < 0.001), and a longer AF cycle length (AFCL, p = 0.011). Five V-AADs changed the electrophysiology in a dose dependent manner. AAD-induced AFCL lengthening (p < 0.001) and reductions in the CV (p = 0.033), peak DF (p < 0.001) and PS number (p < 0.001) were more significant in PITX2+/- deficient than wild-type AF. PITX2+/- deficient AF was easier to terminate with class IC AADs than the wild-type AF (p = 0.018).

**Conclusions:** The computational modeling-guided AAD test was feasible for evaluating the efficacy of multiple AADs in patients with AF. AF wave-dynamics and electrophysiological characteristics are different among the PITX2 deficient and the wild-type genotype models.

|                    | Baseline        |                 |         | Changes after AAD |                 |         | Class IC        |                |         | Class III      |                |         |
|--------------------|-----------------|-----------------|---------|-------------------|-----------------|---------|-----------------|----------------|---------|----------------|----------------|---------|
|                    | Wild-type       | PITX2+/-        | p-value | Wild-type         | PITX2+/-        | p-value | Wild-type       | PITX2+/-       | p-value | Wild-type      | PITX2+/-       | p-value |
| APD90, (ms)        | 243.7 ± 33.8    | 184.4 ± 15.5    | <0.001  | 38.2 ± 37.3       | 43.4 ± 56.2     | 0.223   | 275.9 ± 43.5    | 219.0 ± 39.2   | <0.001  | 284.9 ± 32.8   | 233.8 ± 71.4   | <0.001  |
| CV, (m/s)          | 0.78 ± 0.32     | 0.70 ± 0.21     | 0.347   | -0.15 ± 0.18      | -0.20 ± 0.26    | 0.033   | 0.63 ± 0.32     | 0.53 ± 0.30    | 0.027   | 0.60 ± 0.36    | 0.43 ± 0.33    | <0.001  |
| Mean Smax          | 0.787 ± 0.28    | 0.531 ± 0.18    | <0.001  | 0.005 ± 0.26      | 0.115 ± 0.24    | <0.001  | 0.828 ± 0.31    | 0.694 ± 0.32   | 0.003   | 0.768 ± 0.32   | 0.608 ± 0.27   | <0.001  |
| Mean AFCL, (ms)    | 146.96 ± 24.61  | 164.78 ± 22.73  | 0.011   | 22.62 ± 24.55     | 37.92 ± 32.72   | <0.001  | 165.44 ± 36.96  | 190.85 ± 35.61 | <0.001  | 169.05 ± 25.26 | 203.35 ± 34.78 | <0.001  |
| Peak DF, (Hz)      | 10.68 ± 2.97    | 11.82 ± 3.34    | 0.211   | -2.98 ± 4.94      | -5.46 ± 4.66    | <0.001  | 10.01 ± 4.39    | 7.23 ± 4.20    | <0.001  | 6.30 ± 4.32    | 5.80 ± 4.07    | 0.301   |
| Mean DF, (Hz)      | 6.80 ± 0.88     | 6.22 ± 0.71     | 0.012   | -1.95 ± 2.44      | -2.20 ± 1.99    | 0.206   | 5.75 ± 1.78     | 4.53 ± 2.00    | <0.001  | 4.14 ± 2.39    | 3.69 ± 2.00    | 0.077   |
| PS Number, (N)     | 101086 ± 96088  | 14150 ± 24778   | <0.001  | -59322 ± 99288    | -7409 ± 27856   | <0.001  | 50579 ± 65236   | 11568 ± 21868  | <0.001  | 32951 ± 55864  | 3524 ± 8302    | <0.001  |
| PS Life Span, (ms) | 109.36 ± 113.90 | 102.24 ± 226.64 | 0.889   | -24.87 ± 72.06    | -41.38 ± 126.35 | 0.073   | 103.36 ± 180.68 | 68.05 ± 162.79 | 0.148   | 71.91 ± 141.86 | 55.99 ± 217.97 | 0.454   |

Table. Effects of AADs in the Wild-type and PITX2+/- Deficiency group  
Abstract Figure. Wild-type vs. PITX2+/- baseline model

Figure. Wild-type vs. *PITX2*<sup>-/-</sup> baseline model analysis

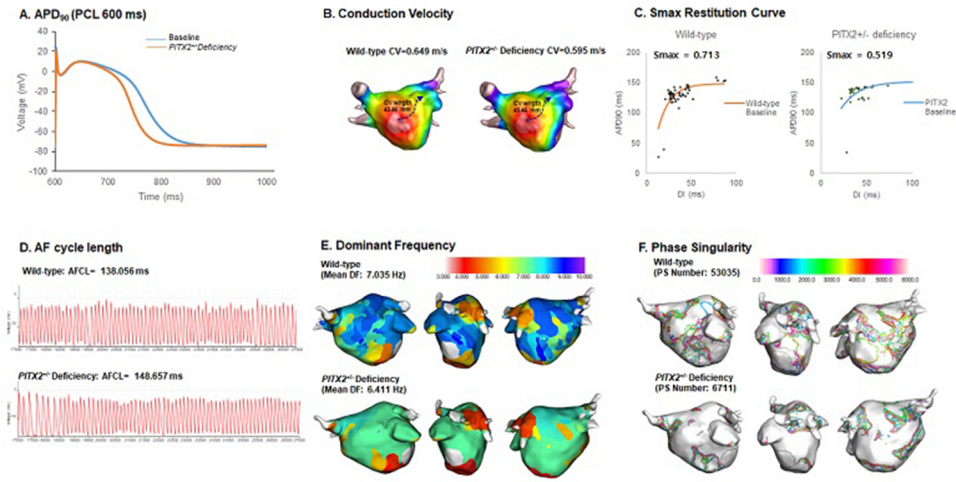

Source: http://academic.oup.com/europace/article-pdf/23/Supplement_3/euab116.171/38131511/euab116.171.pdf
